# Supplementary material for: A Comparative Analysis of Polysaccharides and Ethanolic Extracts from Two Egyptian Sweet Potato Cultivars, Abees and A 195: Chemical Characterization and Immunostimulant Activities
Source: MDPI journal article supplement (doi:10.3390/metabo14040222), 2024-04-14
Supplement: s1 [file s1]

**Table S1:** MS/MS fragmentation pattern of some tentatively identified compounds using Mass Hunter software program.

| Compound name                                                                                                                                                                                                                                                                                                                                                                                           | Fragmentation spectrum |
|---------------------------------------------------------------------------------------------------------------------------------------------------------------------------------------------------------------------------------------------------------------------------------------------------------------------------------------------------------------------------------------------------------|------------------------|
| 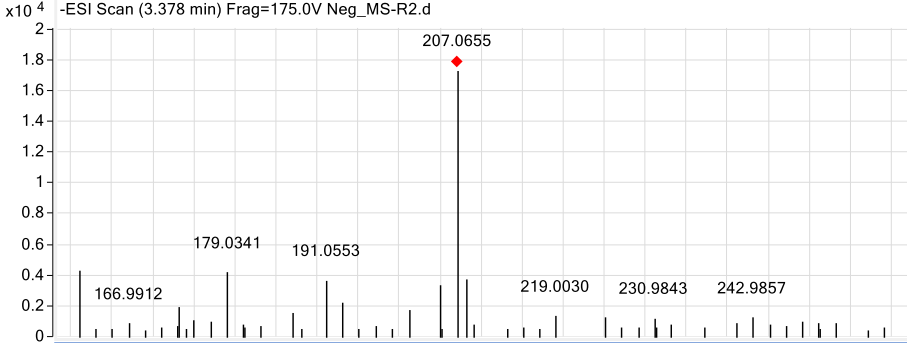 <p>-ESI Scan (3.378 min) Frag=175.0V Neg_MS-R2.d</p> <p>Counts vs. Mass-to-Charge (m/z)</p>  <p>-ESI Product Ion (3.383 min) Frag=231.7V CID@28.4 (367.1024[z=1] -&gt; **) Neg_MS-R2.d</p> <p>Counts vs. Mass-to-Charge (m/z)</p> | Feruloyl quinic acid   |
|  <p>-ESI Scan (0.517 min) Frag=175.0V Neg_MS-R2.d</p> <p>Counts vs. Mass-to-Charge (m/z)</p>  <p>-ESI Product Ion (0.539 min) Frag=206.7V CID@15.9 (117.0184 -&gt; **) Neg_MS-R2.d</p> <p>Counts vs. Mass-to-Charge (m/z)</p>   | Succinic acid          |

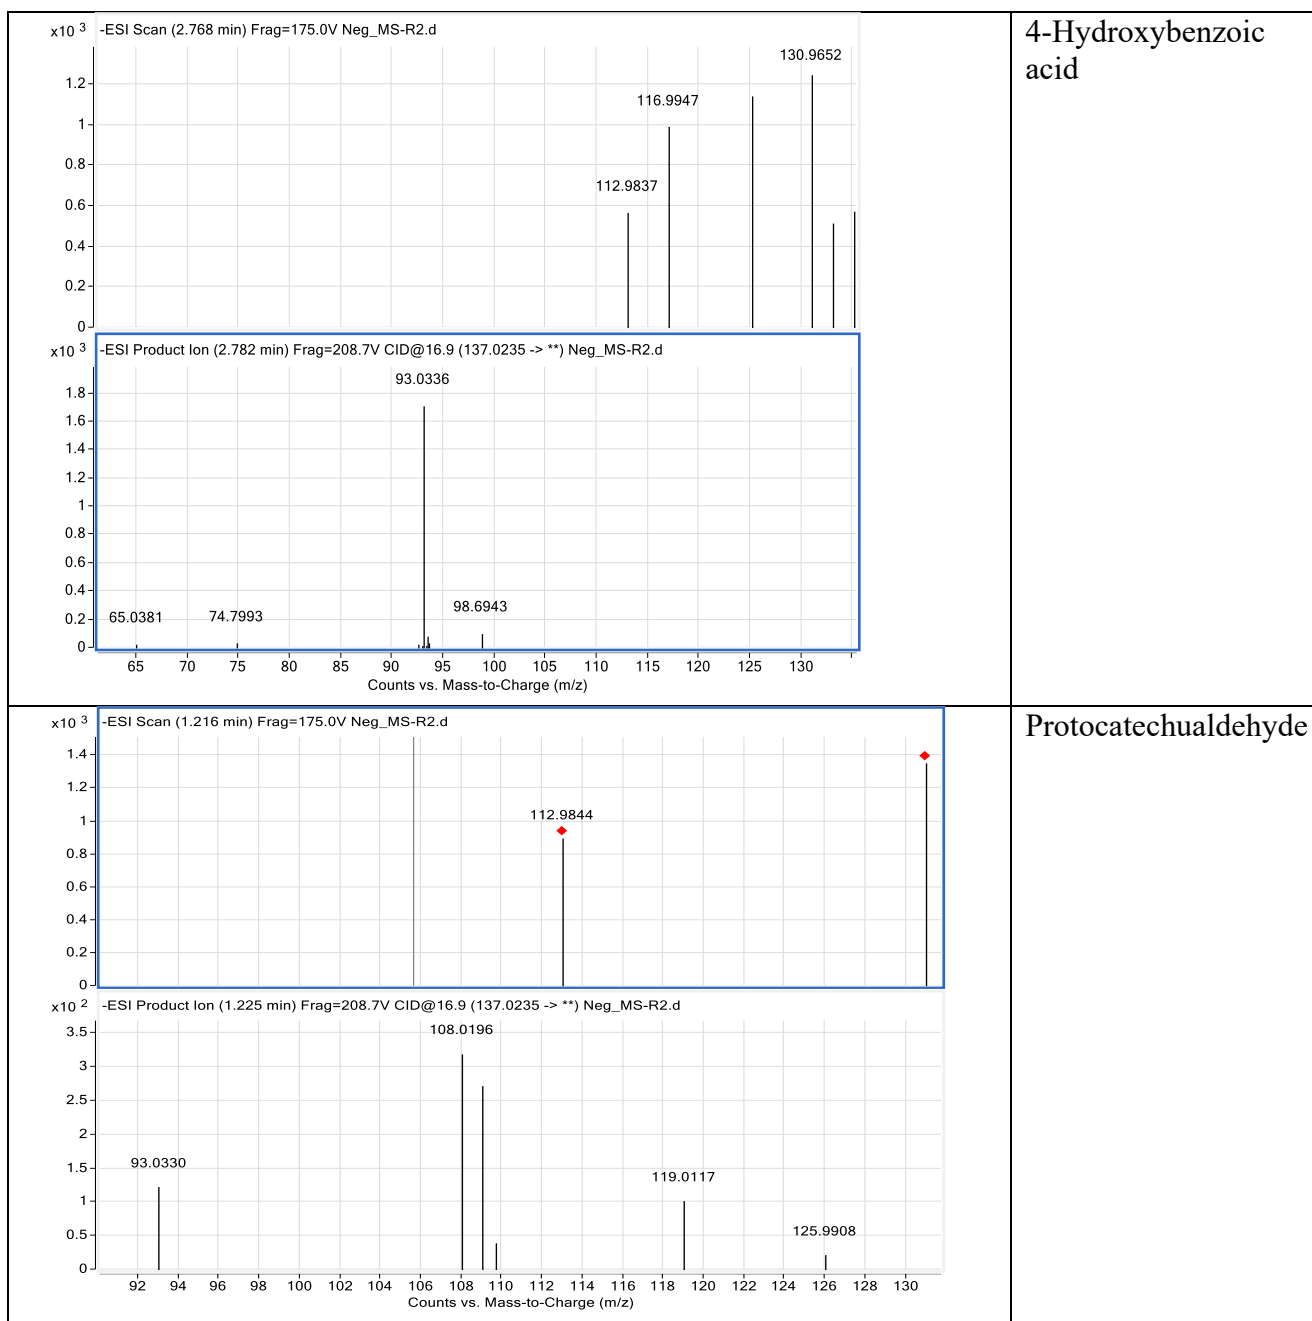

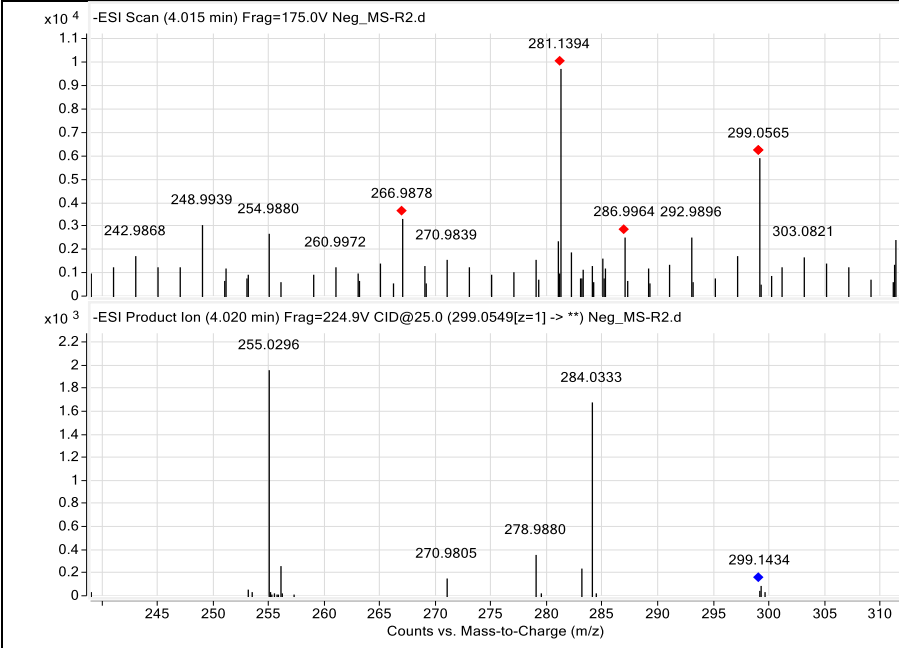

Diosmetin
